# Supplementary material
Source: Research Square preprint supplement (doi:10.21203/rs.3.rs-9814805/v1)
Supplement: Supplementary file 1 [file fc44bb039aa171e0ae4a39cb.docx]

**Instruments**

To support the quantitative and qualitative findings, five study instruments were developed and used. The instruments were aligned with the Script-Distance-Responsive (SDR) framework so that script ecology, linguistic control, genre awareness, writing performance, learner reflections, and classroom processes could be captured systematically. The instruments included a learner background and script-ecology questionnaire, parallel genre-based writing tasks, an analytic Arabic L2 writing rubric, a semi-structured interview protocol, and a classroom observation memo template.

The questionnaire included categorical profile items and Likert-type difficulty items. The writing rubric was treated as an ordinal analytic rating instrument with anchored descriptors rather than as a Likert questionnaire. The interview and observation tools were used to triangulate the quantitative trends and to explain how learners experienced script distance, cognitive load, feedback, and genre-based scaffolding.

**Instrument 1. Learner Background and Script-Ecology Questionnaire (LBSQ)**

The LBSQ was designed to verify learners’ script-ecology profiles and to support the calculation of Simpson’s Diversity Index. It collected demographic, language background, literacy-history, Arabic-exposure, and self-perceived difficulty data. The Likert-type section measured perceived difficulty in core script and paragraph-level processes.

**Table 1**

*Learner Background and Script-Ecology Questionnaire Items*

| **Section** | **Item** | **Question and response format** | **Analytic purpose** |
| --- | --- | --- | --- |
| A. Demographic profile | 1 | Nationality — open response | Classify learner background and country of origin. |
| A. Demographic profile | 2 | Native language (L1) — open response | Identify the learner’s primary linguistic background. |
| A. Demographic profile | 3 | Language of schooling (primary/secondary) — open response | Determine prior literacy medium and educational language exposure. |
| A. Demographic profile | 4 | Additional languages known — open response | Document multilingual experience relevant to script ecology. |
| B. Literacy history | 5 | Writing system(s) used in previous education — multiple response: Latin; Arabic/Arabic-adjacent; logographic; other | Classify previous script experience and estimate script distance. |
| B. Literacy history | 6 | Prior Arabic exposure — multiple response: none; religious/Quranic literacy only; weekend/community school; formal university study with duration | Differentiate formal, informal, and religious literacy exposure. |
| C. Self-perceived difficulty | 7a | Connecting Arabic letters — five-point Likert-type scale | Measure perceived difficulty with letter connectivity. |
| C. Self-perceived difficulty | 7b | Placing dots and vowels — five-point Likert-type scale | Measure perceived difficulty with diacritics, dotting, and orthographic precision. |
| C. Self-perceived difficulty | 7c | Organizing a whole paragraph — five-point Likert-type scale | Measure perceived difficulty with paragraph-level organization. |

*Note.* LBSQ = Learner Background and Script-Ecology Questionnaire. Multiple-response items allowed participants to select all applicable options.

**Table 2**

*Likert-Type Response Scale for Self-Perceived Difficulty Items*

| **Scale point** | **Anchor** | **Interpretation** |
| --- | --- | --- |
| 1 | Very easy | Minimal difficulty with the skill. |
| 2 | Easy | Limited difficulty. |
| 3 | Moderate | Manageable but noticeable difficulty. |
| 4 | Difficult | Substantial difficulty. |
| 5 | Very difficult | Severe difficulty requiring sustained support. |

*Note.* The response scale was directionally consistent across the three self-perceived difficulty items: higher scores indicated greater perceived difficulty.

**Instrument 2. Genre-Based Writing Tasks (Parallel Forms)**

Two parallel descriptive writing tasks were used to generate pre-test and post-test writing samples. Both tasks required learners to produce a short descriptive text under the same timing and support conditions. The prompts were parallel in genre, length, and communicative purpose, but differed in topic to reduce repetition effects.

**Table 3**

*Parallel Genre-Based Writing Tasks*

| **Assessment point** | **Prompt** | **Minimum length** | **Administration conditions** |
| --- | --- | --- | --- |
| Pre-test | Describe your favorite place in your home country for a friend who has never visited. Include details about the sights, smells, and sounds. | At least 6–8 sentences | 40 minutes; no dictionaries or translation devices; handwritten on a lined response sheet. |
| Post-test | Describe a traditional market (souq) or a famous landmark in a city you know well for a travel blog. Focus on describing the atmosphere and the people. | At least 6–8 sentences | 40 minutes; no dictionaries or translation devices; handwritten on a lined response sheet. |

*Note.* Both tasks were descriptive-genre prompts and were handwritten to allow raters to assess orthographic connectivity, directionality, spacing, and related script-level features.

**Instrument 3. Analytic Arabic L2 Writing Rubric**

The analytic Arabic L2 writing rubric was used by trained raters to score written performance for quantitative analysis. It assessed four dimensions: orthographic accuracy, morphosyntactic control, cohesion, and genre organization. The rubric used anchored descriptors at three performance levels: high performance, mid-level performance, and low performance.

**Table 4**

*Analytic Arabic L2 Writing Rubric*

| **Score** | **Level** | **Criterion** | **Descriptor** |
| --- | --- | --- | --- |
| 5 | Expert | Orthographic accuracy (script) | Connectivity, directionality, and dotting are accurate; hamza and vowels are used appropriately. |
| 5 | Expert | Morphosyntactic control (grammar) | Gender/number agreement, definiteness, and verb forms are controlled accurately. |
| 5 | Expert | Cohesion (linking) | Cohesive devices such as wa, thumma, and lakin are used effectively; reference is clear. |
| 5 | Expert | Genre organization (staging) | The text has a clear opening, developed descriptive body, and concluding evaluative move. |
| 3 | Mid | Orthographic accuracy (script) | Minor errors appear in connectivity, spacing, or dot placement, but the text remains generally legible. |
| 3 | Mid | Morphosyntactic control (grammar) | Agreement is inconsistent, and occasional errors occur in noun-adjective strings and related structures. |
| 3 | Mid | Cohesion (linking) | Cohesion relies heavily on repeated wa, and some sentences remain weakly connected. |
| 3 | Mid | Genre organization (staging) | The expected stages are recognizable, but transitions are abrupt or formulaic. |
| 1 | Low | Orthographic accuracy (script) | Directionality errors are frequent; letters are often unconnected, distorted, or difficult to read. |
| 1 | Low | Morphosyntactic control (grammar) | Word order and agreement errors are severe, and basic morphosyntactic control is largely absent. |
| 1 | Low | Cohesion (linking) | Linking words are absent or ineffective, and the text reads as disconnected fragments. |
| 1 | Low | Genre organization (staging) | The text lacks clear staging and does not adequately fulfill the descriptive genre purpose. |

*Note.* The rubric is an ordinal analytic scoring instrument. The displayed anchors are 1, 3, and 5; intermediate scores should be used only if the study scoring protocol explicitly permitted them.

**Instrument 4. Semi-Structured Interview Protocol**

The semi-structured interview protocol was used to generate qualitative data explaining learners’ experiences of Arabic script learning, genre-based writing, cognitive load, feedback uptake, and script distance. The questions were open-ended to allow participants to describe changes in their own learning process while preserving comparability across interviews.

**Table 5**

*Semi-Structured Interview Protocol*

| **Domain** | **Guiding question** | **Qualitative focus** |
| --- | --- | --- |
| Script experience | When you first started writing this semester, what was the most difficult thing about the Arabic letters? Has that changed? | Tracks perceived change in script-level difficulty and orthographic confidence. |
| Genre awareness | Before this class, how did you decide how to start and end an Arabic paragraph? How did the model texts change your approach? | Explores awareness of genre staging and the influence of model texts. |
| Cognitive load | Do you feel you spend more time thinking about how to write a word, such as spelling and dots, or about what to say, such as meaning? Describe that feeling. | Examines the distribution of attention between script production and meaning construction. |
| Feedback uptake | When the teacher used the analytic rubric to give you feedback, which category, such as cohesion or orthography, did you find most helpful for your revision? Why? | Identifies which rubric dimensions supported revision most clearly. |
| Script distance | For non-Arabic script users: Does your first language help you or confuse you when you try to organize your ideas in Arabic? | Captures perceived transfer, interference, or support from the learner’s first language and script background. |

*Note.* Questions could be followed by neutral probes such as “Can you give an example?” or “What happened during revision?” to clarify participants’ responses without leading them.

**Instrument 5. Classroom Observation Memo Template**

The classroom observation memo template was used to triangulate writing gains and interview themes with instructional practice. The template focused on instructional phase, critical incidents, engagement patterns across script-ecology groups, and the explicitness of feedback delivery.

**Table 6**

*Classroom Observation Memo Template*

| **Field** | **Recording prompt/format** | **Analytic purpose** |
| --- | --- | --- |
| Date/level | Date and learner level or class section. | Contextualizes the observation and links it to the instructional sequence. |
| Instructional phase | Select one: model analysis; joint construction; independent writing. | Identifies where the observed episode occurred in the genre-based instructional cycle. |
| Critical incidents | Record salient episodes, such as multiple students struggling with ta marbutah during the descriptive task. | Documents recurring difficulty points or moments of visible learning. |
| Learner engagement | Describe how learners from different script-ecology groups responded to orthographic scaffolding. | Supports comparison across learner profiles and script-distance groups. |
| Feedback delivery | Record whether the instructor explicitly linked a grammar point to a genre move. | Assesses alignment between linguistic feedback and genre-based writing goals. |

*Note.* The memo template was used for triangulation and was not treated as a psychometric scale.

**Scoring and Use of the Instruments**

Together, these instruments provided complementary forms of evidence. The LBSQ established learner background and script-ecology profiles; the parallel writing tasks generated comparable pre-test and post-test writing samples; the analytic rubric produced ordinal writing-performance scores; the interview protocol explained learners’ perceptions of script learning, genre awareness, and feedback; and the observation template linked classroom events to the patterns identified in the quantitative and qualitative analyses.

For reporting purposes, categorical questionnaire responses were summarized descriptively, Likert-type difficulty items should be reported with appropriate ordinal or scale-based descriptive statistics as justified by the analysis plan, and rubric scores should be reported by dimension and assessment point. Qualitative interview and observation data were coded thematically and integrated after the quantitative findings to explain, elaborate, or qualify the statistical results.
